# Supplementary material for: The olfactory epithelium as a gateway for bloodborne nanoparticles to the central nervous system
Source: Royal Society of Chemistry journal article supplement (doi:10.1039/d5bm01311a), 2025-11-07
Supplement: d5bm01311a1.pdf [file d5bm01311a1.pdf]

## The Olfactory Epithelium as a Gateway for Bloodborne Nanoparticles to the Central Nervous System

Marina B. Sharapova <sup>a</sup>, Kseniia A. Amelina <sup>e</sup>, Lyubov I. Kazakova <sup>d</sup>, Tatiana V. Ilchibaeva <sup>a</sup>, Daniil S. Zuev <sup>a</sup>, Olga I. Solovieva <sup>a</sup>, Ksenia A. Morozova <sup>a</sup>, Maria V. Zhukova <sup>f</sup>, Elena V. Kiseleva <sup>a</sup>, Gleb B. Sukhorukov <sup>d,e,\*</sup>, Alexander V. Romashchenko <sup>a,b,c,d\*</sup>

<sup>a</sup> Federal research center Institute of Cytology and Genetics (ICG), Siberian Branch of Russian Academy of Sciences (SB RAS), Novosibirsk 630090, Russia

<sup>b</sup> National Research Tomsk Polytechnic University, Tomsk 634050, Russia

<sup>c</sup> Federal Research Center for Information and Computational Technologies, Novosibirsk 630090, Russia

<sup>d</sup> Life Improvement by Future Technology Center LLC (LIFT), Moscow 121205, Russia

<sup>e</sup> Vladimir Zelman Center for Neurobiology and Brain Rehabilitation (CNBR), Moscow 121205, Russia

<sup>f</sup> Institute of Gene Biology, Russian Academy of Sciences, Moscow 117334, Russia

\*Corresponding authors: Alexander Romashchenko (a.romashenko@lift.center), Gleb Sukhorukov (g.sukhorukov@lift.center)

## MATERIALS AND METHODS

### MTT Assay

To estimate the toxicity of Mn<sub>3</sub>O<sub>4</sub>-NPs and PtO-NPs, two cell lines were used: rat pheochromocytoma PC12 cells (ATCC CRL-1721) and non-tumorigenic human fibroblasts BJ-5ta (ATCC CRL-4001). Cells preserved in liquid nitrogen were thawed according to standard protocol and cultured in DMEM/F12 (1:1; Biolot, Russia) supplemented with 10% fetal bovine serum (FBS; Biolot, Russia) at 37 °C in plastic flasks (Jet Biofil, China) under humidified conditions with 5% CO<sub>2</sub>. For passaging, cells were detached using a 0.25% trypsin and 0.02% versene solution (1:1; Biolot, Russia), and enzymatic activity was quenched by adding complete growth medium. Cell concentration was determined using a Countess automated cell counter (Invitrogen, USA). For the MTT assay, cells were seeded into 96-well plates (SPL, Korea) at 20,000 cells per well and incubated for 24 h at 37 °C, 5% CO<sub>2</sub> (Sanyo MCO-5A incubator). Test NPs were added at an initial concentration of 30 µg/mL and serially diluted in twofold steps (six replicates per concentration). Cells were incubated for 96 h under the same conditions. After incubation, the medium was replaced with 90 µL of serum-free medium and 10 µL of MTT solution (5 mg/mL in PBS; Dia-M, Russia). Following a 2-hour incubation, the solution was

removed, formazan crystals were dissolved in DMSO (Biolot, Russia), and absorbance was measured at 595 nm using a Multiskan SkyHigh plate reader (Thermo Fisher Scientific, USA). Cell viability was calculated relative to the untreated control, which was set at 100%. To confirm that the intrinsic light absorption of the NPs would not interfere with the MTT assay, we characterized their UV-vis spectra. Both Mn<sub>3</sub>O<sub>4</sub>-NPs and PtO-NPs exhibited a single absorption peak, with maxima at approximately 290 nm and 320 nm, respectively. Since the MTT assay measures formazan absorbance at 595 nm—a wavelength distant from the NP absorption peaks—we concluded that their optical properties did not significantly confound the assay results.

### **MRI signal dynamics modelling**

MRI scans were performed before administration and at 3, 6, 9, 12, 24, 48, 96, and 168 h post-administration. The MRI contrast was quantified as the log<sub>2</sub> ratio of the signal intensity after ( $S^{[Mn]}$ ) to before ( $S_0$ ) Mn<sub>3</sub>O<sub>4</sub>-NP administration:  $\log_2(S(t)) = \log_2(S^{[Mn]}/S_0)$ . This model assumed that the MRI signal logarithm  $\log(S)$  increases linearly over time  $T$  with rate  $R_{acc}$  until it reaches a peak at time  $T_{max}$ . Then  $\log(S)$  starts decreasing with the rate  $R_{dec}$ , so the model equation becomes:  $\log(S(T)) = \log(S(0)) + R_{acc} * T + H(T - T_{max}) * R_{dec} * T + N(0, \sigma)$ , where  $H$  is Heaviside step function (if  $x \leq 0$  then  $H(x) = 0$  else  $H(x) = 1$ ),  $N(0, \sigma)$  is a normally distributed residual. Fig S2A shows some model predictions with 95% prediction band.

## RESULTS

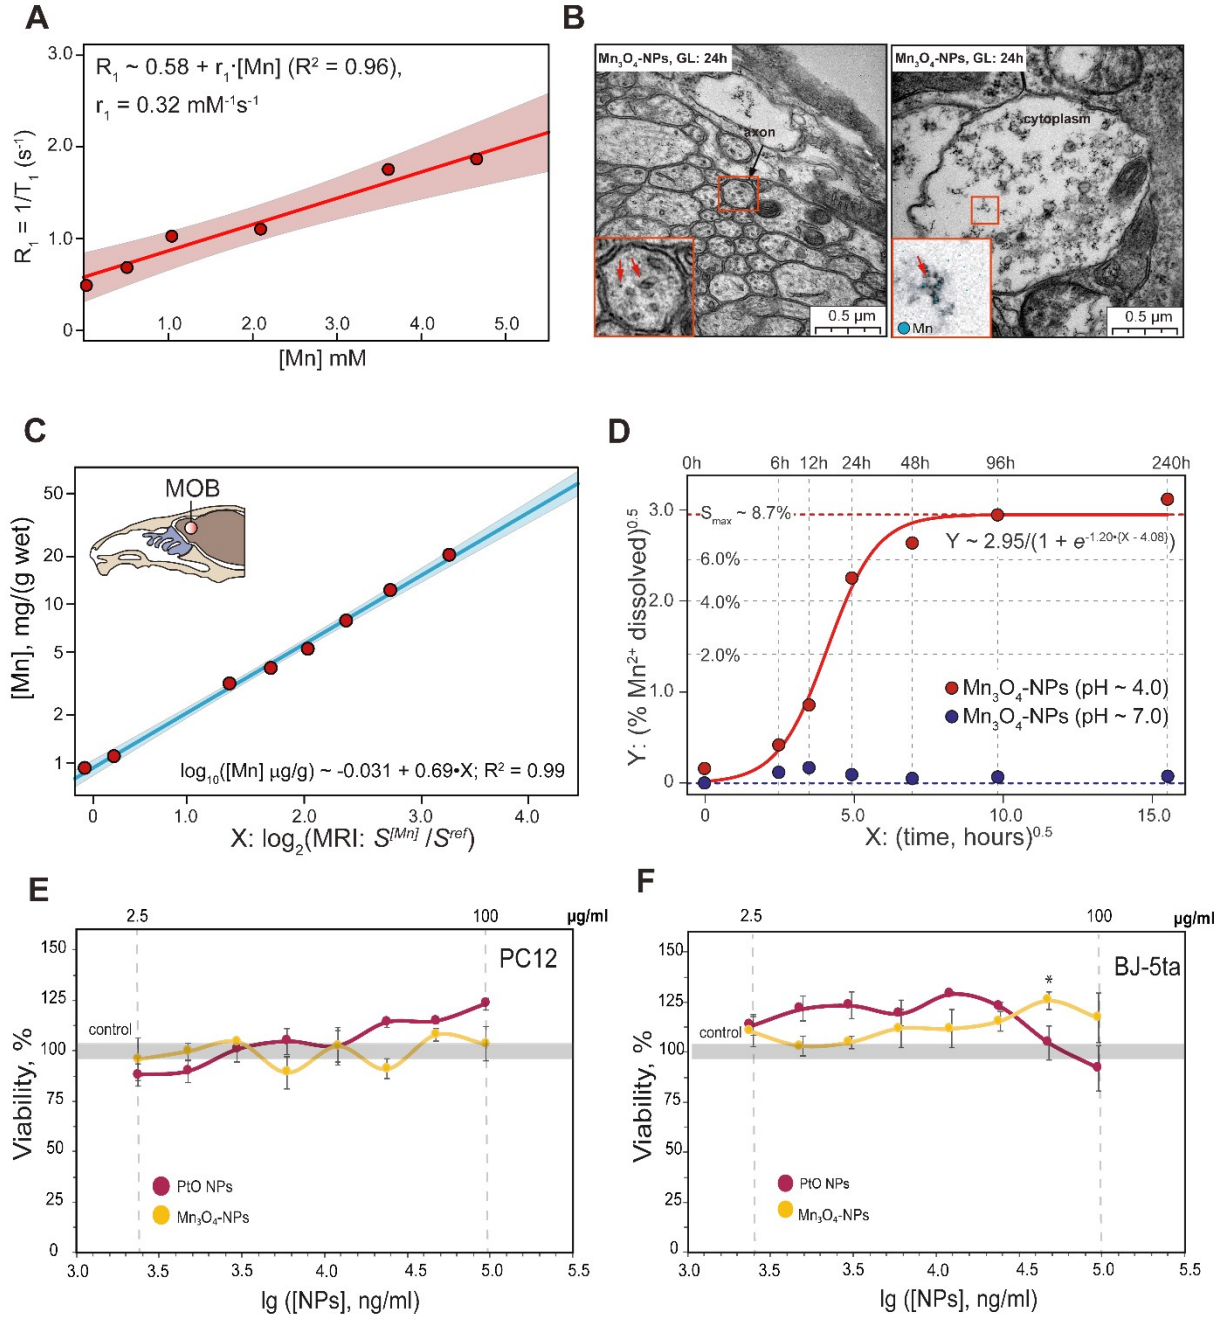

**G**

| media       | $d_{\text{aq}}$ , nm | $\zeta$ , mV | $r1$ , $\text{mM}^{-1} \cdot \text{s}^{-1}$ | $r2$ , $\text{mM}^{-1} \cdot \text{s}^{-1}$ |
|-------------|----------------------|--------------|---------------------------------------------|---------------------------------------------|
| mQ          | 142±23               | -28±2,1      | 0,322±0,02                                  | 7,6±1,4                                     |
| saline      | 227±57               | -18±8,1      | 0,22±0,05                                   | 6,8±1,1                                     |
| saline+BSA  | 89±45                | -28±8,5      | 1,28±0,07                                   | 6,5±5,1                                     |
| blood       | N/A                  | N/A          | 0,89±0,04                                   | 7,1±1,0                                     |
| blood serum | N/A                  | N/A          | 1,36±0,05                                   | 6,8±1,1                                     |
| nasal mucus | 113±36               | -23±2,5      | 1,282±0,04                                  | 7,1±1,8                                     |
| cytoplasm   | 89±45                | -28±8,5      | 1,96±0,07                                   | 6,5±5,1                                     |

**Figure S1.** Characterization of metal oxide NPs. (A) Estimation of longitudinal relaxivity  $r_1$  of the  $\text{Mn}_3\text{O}_4$ -NPs in water. (B) TEM analysis of  $\text{Mn}_3\text{O}_4$ -NP localization in mouse main olfactory bulb (MOB). (C) The relation between the concentrations of  $[\text{Mn}]$  in the MOB ( $\mu\text{g}$  per g wet tissue, as determined by ICP-AES) and normalized T1-weighted MRI signals, assessed 24 h after the intranasal administration of 7  $\mu\text{L}$  of  $\text{Mn}_3\text{O}_4$  -NPs at various concentrations (0, 2, 4, or 6 mg/mL). (D) *In vitro* solubility of the  $\text{Mn}_3\text{O}_4$ -NPs. To estimate the % of dissolved  $[\text{Mn}]$ , the NPs were incubated at neutral and acidic pH for indicated time points, dialyzed, and the remaining insoluble  $[\text{Mn}]$  content was measured by the ICP-AES. At neutral pH, the  $\text{Mn}_3\text{O}_4$ -NPs were insoluble (blue line). (E, F) Influence of  $\text{Mn}_3\text{O}_4$  NPs and PtO NPs concentration on rat pheochromocytoma PC12 (E) and non-tumorigenic human fibroblasts BJ-5ta (F) cell viability in the MTT assay. (G) Hydrodynamic diameter ( $d_h$ , nm), zeta potential ( $\zeta$ , mV), longitudinal relaxivity  $r_1$  ( $\text{mM}^{-1}\cdot\text{s}^{-1}$ ) and transverse  $r_2$  ( $\text{mM}^{-1}\cdot\text{s}^{-1}$ ) of the  $\text{Mn}_3\text{O}_4$ -NPs in various biological media. The biological media were prepared in accordance with previously described methods [1-3]. Cytoplasmic extracts were prepared from mouse olfactory bulb tissue.



ventral pallidum/substantia innominata, BNST – bed nuclei stria terminalis, DMHN – dorsomedial nucleus of hypothalamus, Pit – pituitary. \* -  $p < 0.05$  between routes (Student's t-test).

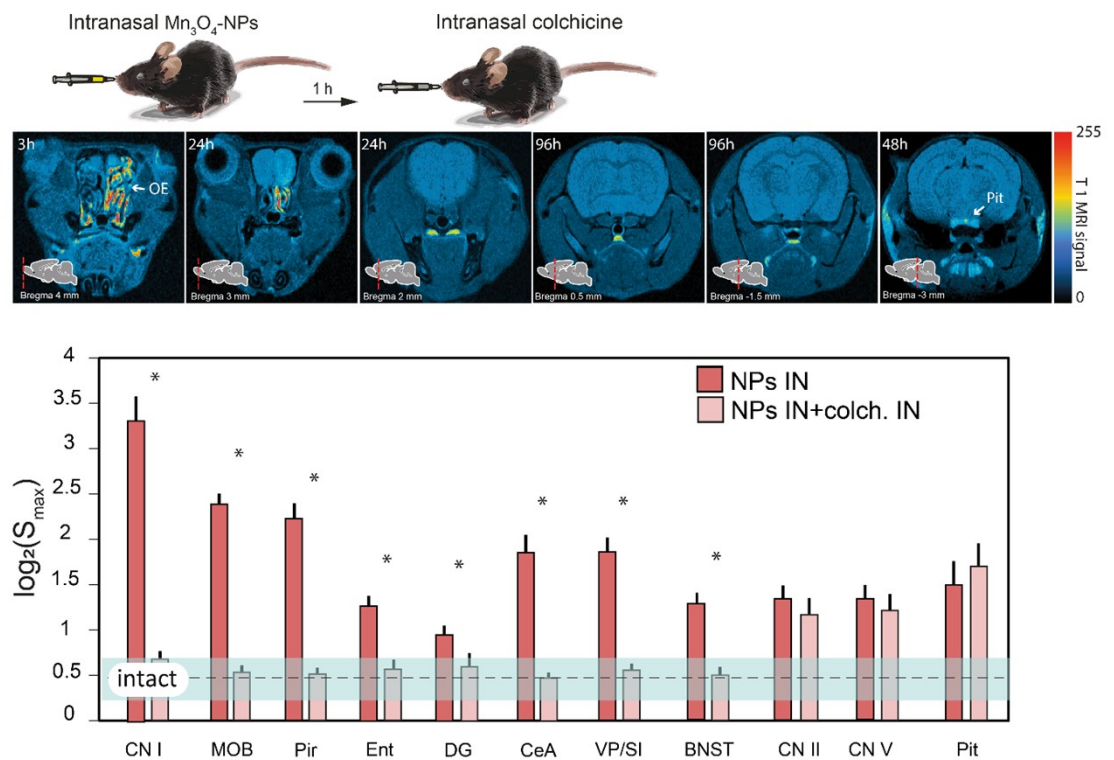

**Figure S3.** Role of axonal and non-axonal transport mechanisms in Mn<sub>3</sub>O<sub>4</sub>-NP accumulation in the mouse CNS after IN administration. Representative T1-weighted MR images of mouse brain after Mn<sub>3</sub>O<sub>4</sub>-NPs IN injection with a follow-up IN colchicine instillation; images above are selected from time points in which T1 MRI signal elevation is near the maximum for the marked structures; images are color-mapped in the identical way, red color marks super-intensive signal, which corresponds to high NPs concentration, blue color marks near-baseline signal. Whiskers mark standard error; pre-administration baseline signal level is marked by dashed line. \* -  $p < 0.05$  t-test significant differences between colchicine and non-colchicine groups (Student's t-test).

#### References:

- Greenfield, E.A., *Sampling and preparation of mouse and rat serum*. Cold Spring Harbor Protocols, 2017. **2017**(11): p. pdb. prot100271.
- Norwood Jr, J., K. Crissman, and G.E. Hatch, *Nasal lavage antioxidants in guinea pigs, rats, and mice*. Inhalation Toxicology, 1994. **6**(sup1): p. 376-383.
- Abmayr, S.M., M.J. Carrozza, and J.L. Workman, *Preparation of nuclear and cytoplasmic extracts from mammalian cells*. Current protocols in pharmacology, 2001. **12**(1): p. 12.3. 1-12.3. 13.
